# Supplementary material
Source: PubMed Central journal article supplement (PMC7484193)
Supplement: NIHMS1609480-supplement-Supplementary_Material.pdf [file NIHMS1609480-supplement-Supplementary_Material.pdf]

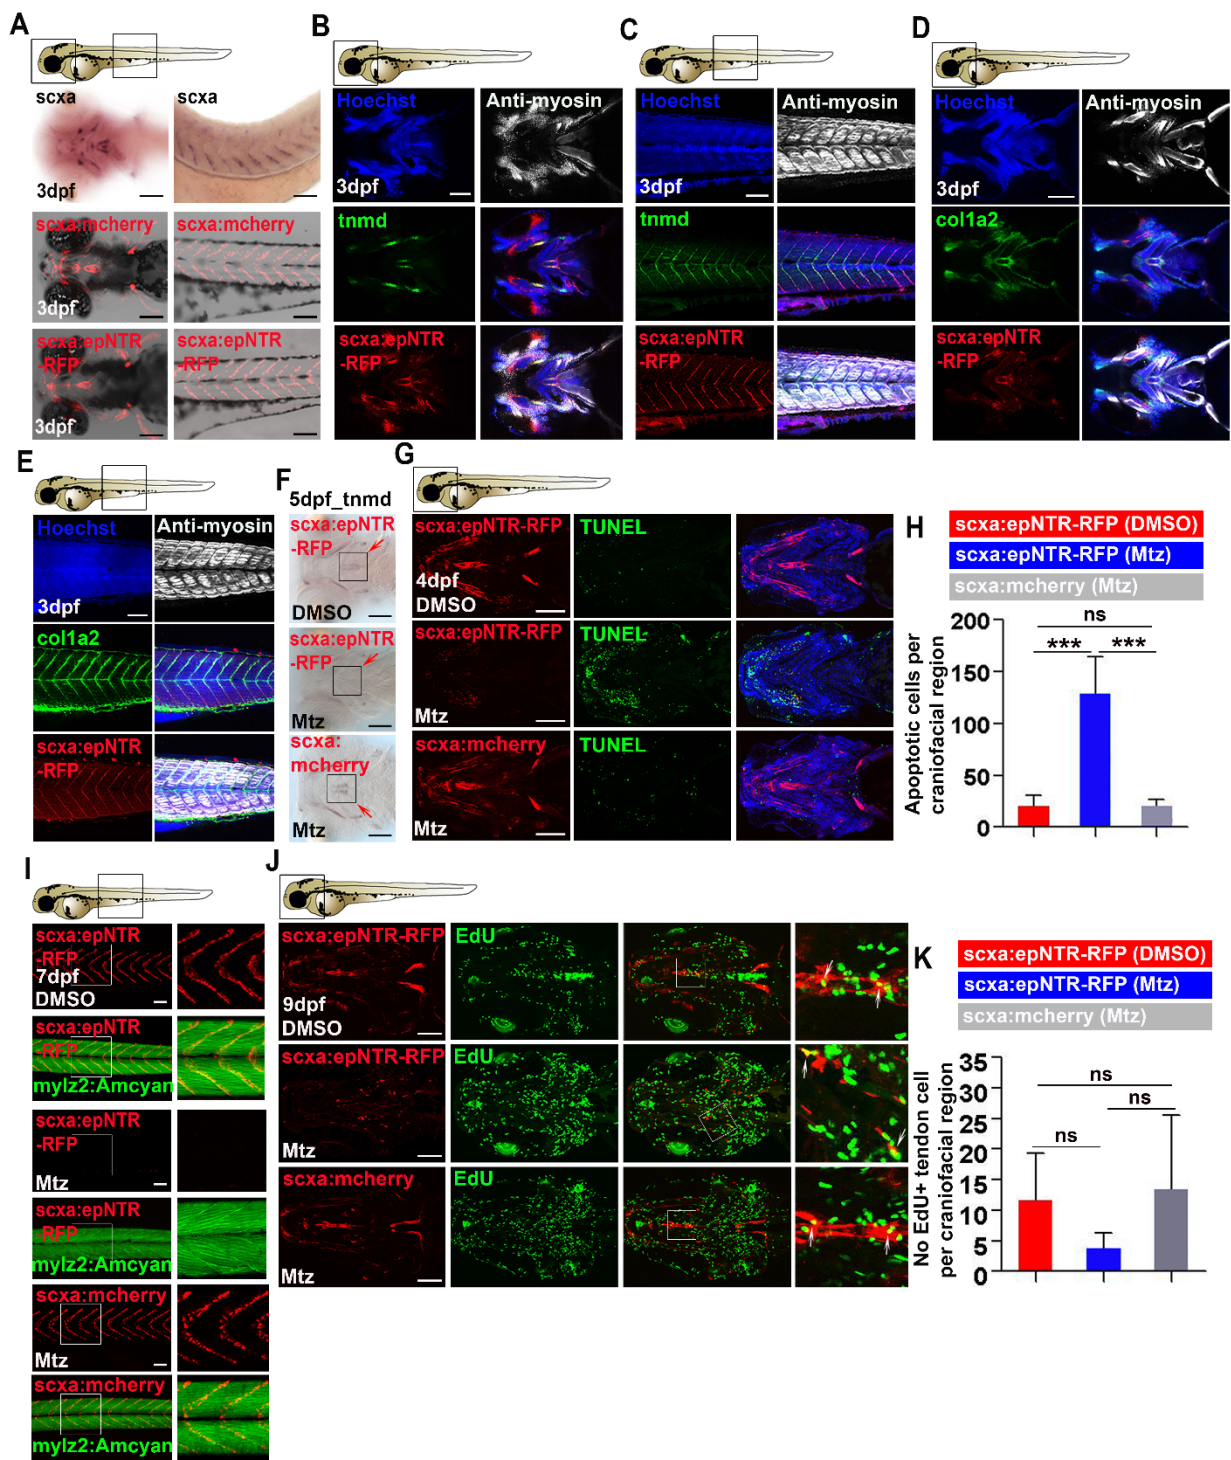

**Figure S1. Characterization of a tendon cell ablation line and tendon cell proliferation, Related to Figure 1.**

(A) Expression of endogenous *scxa* transcript, *Tg(scxa:mcherry)*, and *Tg(scxa:gal4-vp16; uas:epNTR-RFP)* transgene in the craniofacial (left, ventral views) and trunk region (right, lateral views). Scale bar, 100  $\mu$ m.

(B) Optical section of *tnmd* transcript (green) and tendon (red), and muscle (white) in craniofacial region in *Tg(scxa:gal4-vp16; uas:epNTR-RFP)* fish. Scale bar, 100  $\mu$ m.

(C) Confocal images of tendon cells (red), *tnmd* transcript (green) and muscle (white) in the trunk region in *Tg(scxa:gal4-vp16; uas:epNTR-RFP)* fish, lateral view. Scale bar, 100  $\mu$ m.

(D) Optical sections showing tendon cells (red), *col1a2* transcript (green) and muscle (white) in the craniofacial region in *Tg(scxa:gal4-vp16; uas:epNTR-RFP)* fish, ventral views. Scale bar, 100  $\mu$ m.

(E) Confocal images of tendon cells (red), *col1a2* transcript (green) and muscle (white) in the trunk region in *Tg(scxa:gal4-vp16; uas:epNTR-RFP)* fish, lateral views. Scale bar, 100  $\mu$ m.

(F) Craniofacial expression of *tnmd* transcripts in unablated (top and bottom panels) and ablated (middle panel) embryos at 5dpf. Tendon cells were ablated at 3-5dpf. Red arrow, SH tendon region. Scale bar, 100  $\mu$ m.

(G) Confocal images of apoptotic cells in the craniofacial region in unablated (top and bottom panels) and ablated (middle panels) embryos. Tendon cells were ablated at 3-4dpf. Scale bar, 100 $\mu$ m.

(H) Quantification of apoptotic cell number in unablated (red, n=6 and grey, n=5) and ablated (blue, n=6) embryos. One-way ANOVA with tukey's post-hoc analysis and data were mean  $\pm$  s.d. \*\*\*, p<0.001. ns, no significance.

(I) Live images of tendon cells (red) and trunk muscle (green) in unablated (top and bottom panels) and ablated (middle panels) embryos. Insets show magnified view at the right. Scale bar, 100 $\mu$ m.

(J) Confocal images of tendon cells (red) and EdU<sup>+</sup> cells (green) in control (top and bottom panels) and regenerated (middle panels) fish. Insets show magnified view shown at the right. White arrow, EdU<sup>+</sup> tendon cells. Scale bar, 200  $\mu$ m.

(K) Quantification of EdU<sup>+</sup> tendon cell in control (red, n=3 and grey, n=5) and regenerated (blue, n=6) fish. One-way ANOVA with tukey's post-hoc analysis and data were as mean  $\pm$  s.d. ns, no significance. Blue color in (B-E, G) was Hoechst staining. All images, anterior to the left.

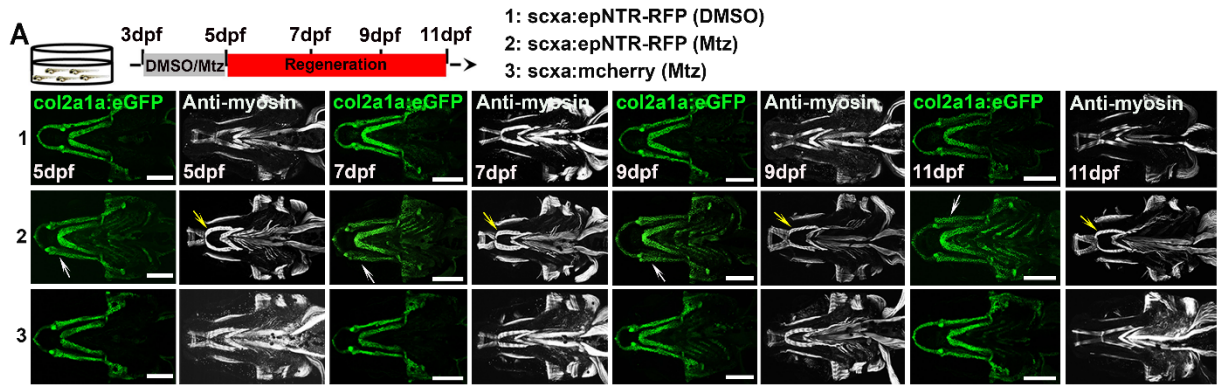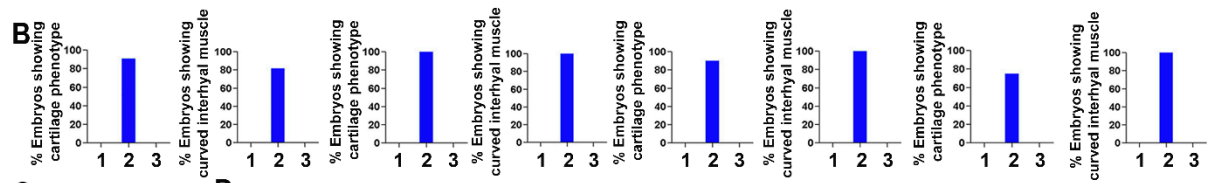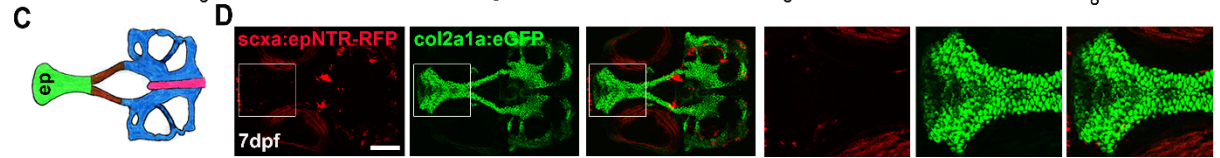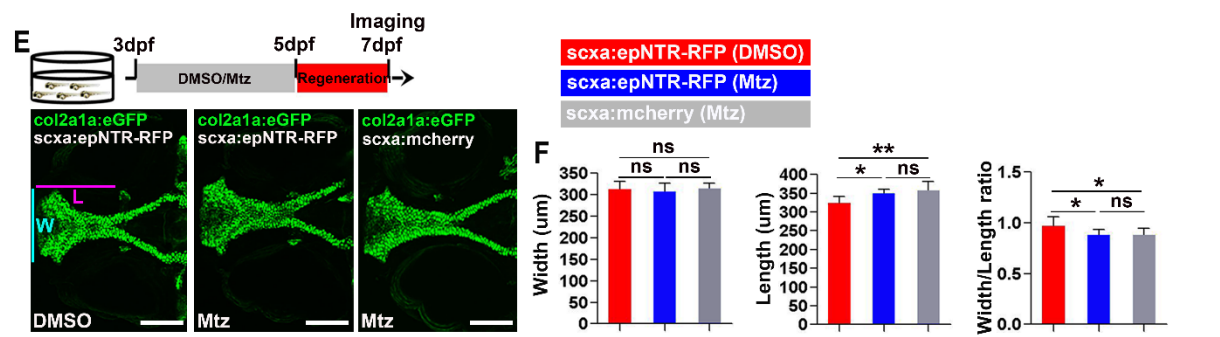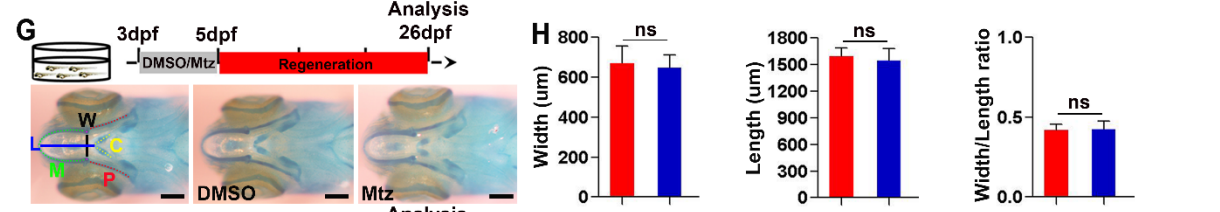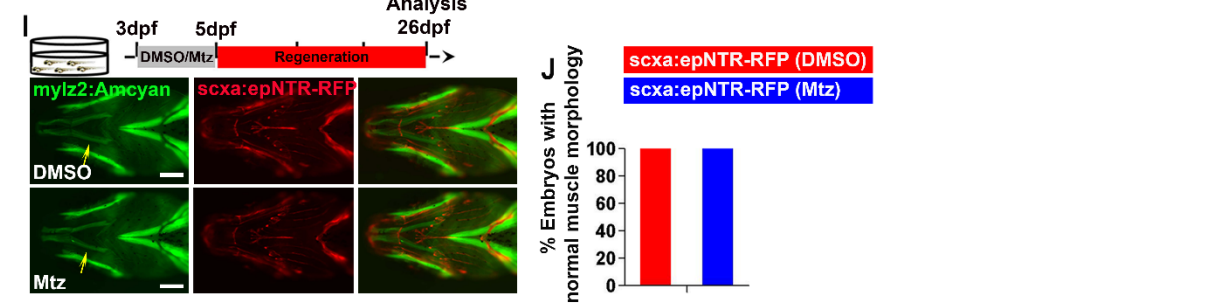

**Figure S2. Tendon cell ablation disrupts the morphology of pharyngeal cartilage and muscle, but not the ethmoid plate, Related to Figure 1.**

(A) Confocal images of cartilage (green) and muscle (white) in unablated (top and bottom panels) and ablated (middle panels) embryos at indicated time points. White arrow, dysmorphic palatoquadrate cartilage. Yellow arrow, curved interhyal muscle. Scale bar, 200  $\mu$ m.

(B) Quantification of cartilage and muscle phenotypes in unablated (Row 1, n=6 for 5 dpf, n=5 for 7 dpf, n=5 for 9 dpf, n=4 for 11 dpf and Row 3, n=4 for 5 dpf, n=4 for 7 dpf, n=5 for 9 dpf, n=3 for 11 dpf) and ablated (Row 2, n=11 for 5 dpf, n=4 for 7 dpf, n=10 for 9 dpf, n=4 for 11 dpf) embryos at indicated time points.

(C) A cartoon of zebrafish neurocranial cartilage. ep, ethmoid plate.

(D) Confocal images of tendon cells (red) and neurocranial cartilage (green) in *Tg(scxa:gal4-vp16; uas:epNTR-RFP; col2a1a:eGFP)* fish. White box showed magnified view of ethmoid plate shown to the right. Scale bar, 200  $\mu$ m.

(E) Confocal images of ethmoid plates in unablated (left and right panels) and ablated (middle panel) *Tg(scxa:gal4-vp16; uas:epNTR-RFP; col2a1a:eGFP)* fish. Scale bar, 200  $\mu$ m.

(F) Quantification of width (left), length (middle), and width/length ratio (right) in unablated (red, n=9 and grey, n=9) and ablated (blue, n=10) fish. One-way ANOVA with tukey's post-hoc analysis and data were mean  $\pm$  s.d. \*, p<0.05. \*\*, p<0.01. ns, no significance.

(G) Alcian blue staining of lower jaw cartilage in unablated (DMSO) and ablated (Mtz) *Tg(scxa:gal4-vp16; uas:epNTR-RFP)* fish at 26 dpf. Scale bar, 1mm.

(H) Quantification of width (left), length (middle), and width/length ratio (right) in unablated (red, n=5) and ablated (blue, n=4) fish at 26 dpf. Two-tailed, unpaired Student's t-test and data were mean  $\pm$  s.d. ns, no significance.

(I) Live images of craniofacial muscle (green) and tendon (red) in unablated (DMSO) and ablated (Mtz) *Tg(scxa:gal4-vp16; uas:epNTR-RFP; mylz2:Amcyan)* fish. Yellow arrow, interhyal muscle. Scale bar, 1 mm.

(J) Quantification of fish with normal muscle morphology in unablated (red, n=15) and ablated (blue, n=10) condition. L, length; W, width; M, meckel's cartilage. P, palatoquadrate cartilage. C, ceratohyal cartilage. dpf, days post fertilization. All images, ventral view, anterior to the left.



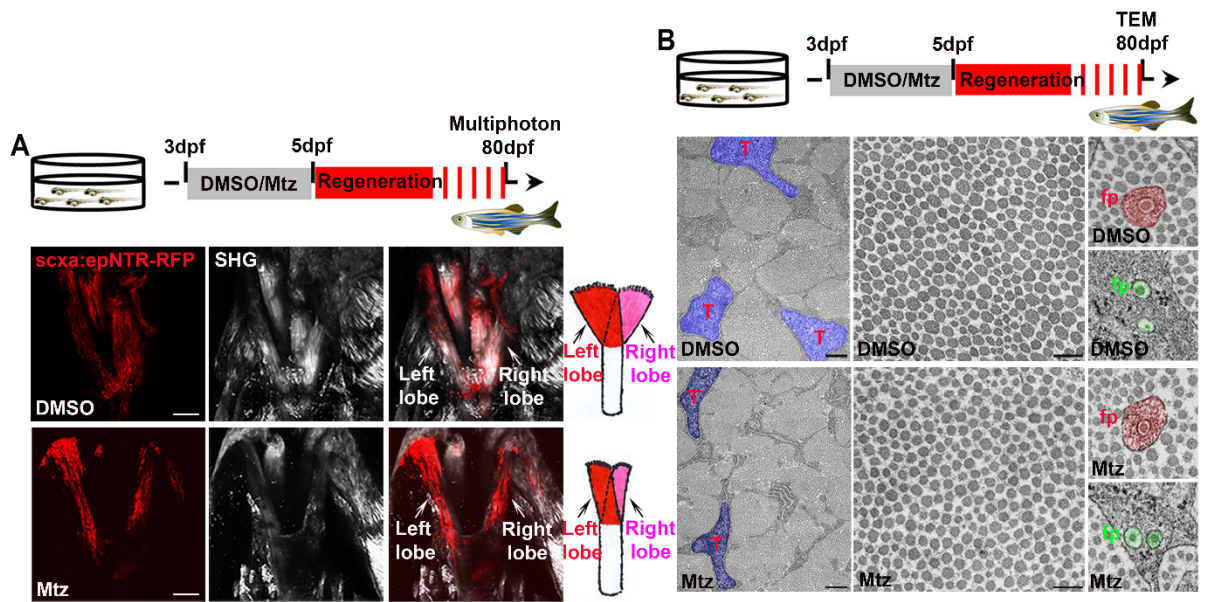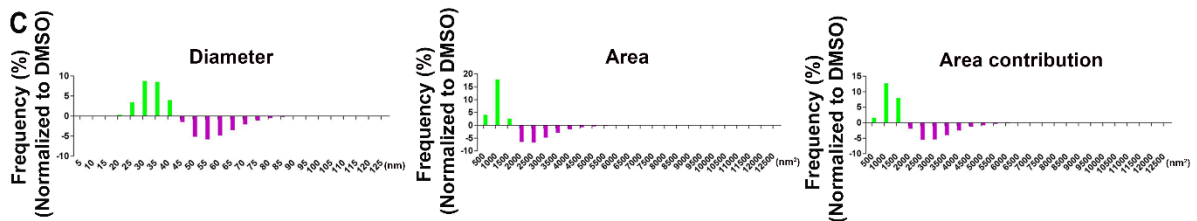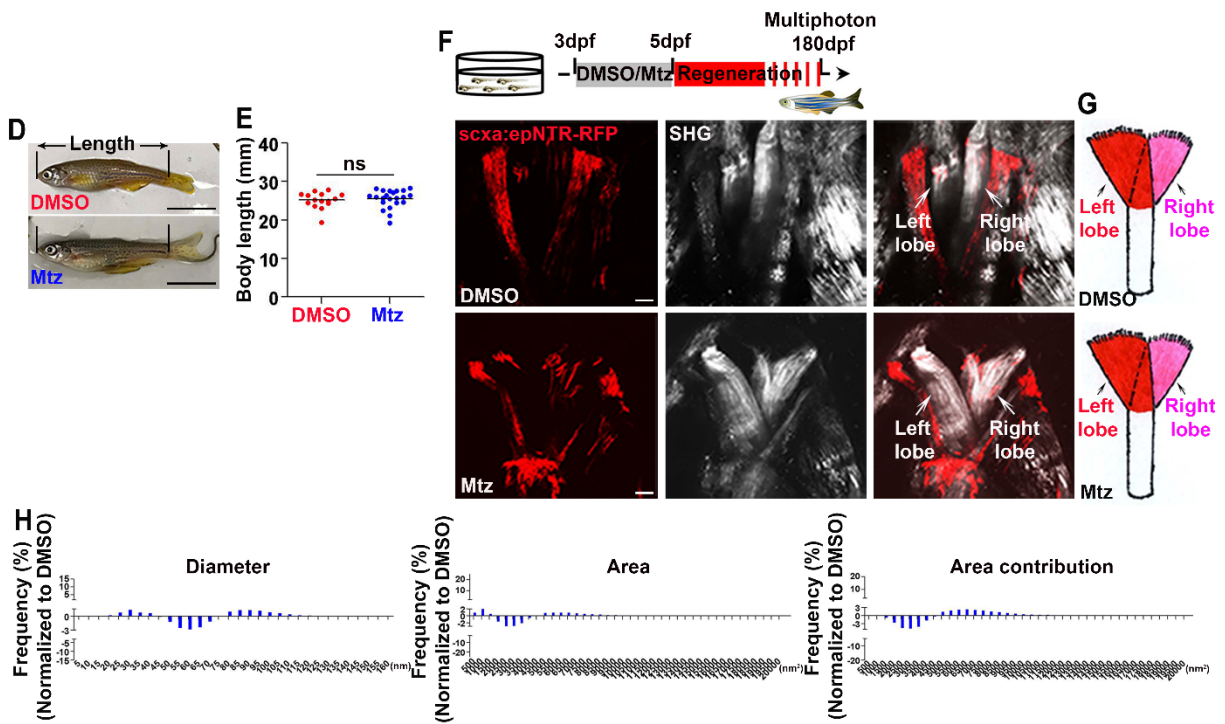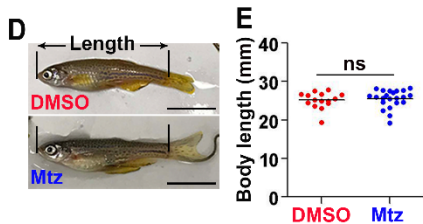

**Figure S3. SH tendon structure in regenerating juveniles and adults, Related to Figure 2.**

(A) Multiphoton images of SH tendon in control (DMSO) and regenerated (Mtz) fish at 80 dpf. Ventral views, anterior to the top. SHG, second harmonic generation. Cartoons in the right show SH tendon lobes (black arrow). Scale bar, 100  $\mu\text{m}$ .

(B) Transmission electron microscopy analysis of SH tendon collagen fibril in control (DMSO) and regenerated (Mtz) at 80 dpf. Low (left panels) and high (middle panels) magnification views of transverse-sectioned SH tendon. Right panels (red fp, fibripositor, extension outside the tendon cell body. green fp, fibripositor with collagen fibril inside the tendon cell body). T, tendon cell. Scale bar, 1  $\mu\text{m}$  (left panels) and 0.2 $\mu\text{m}$  (middle panels).

(C) Distribution of collagen fibril diameter (left), area (middle) and area contribution (right) in regenerated SH tendon at 80 dpf after normalizing to control SH tendon. Green bars showed the increase in small diameter, area, and area contribution. Purple bars showed the decrease in large diameter, area and area contribution.

(D) Representative images for control (DMSO) and regenerated (Mtz) fish at 180 dpf. Scale bar, 1cm.

(E) Quantification of body length at 180 dpf for control (DMSO, n=15) and regenerated (Mtz, n=22) fish. Each dot represents the body length of individual fish. Two-tailed, unpaired Student's t-test and data were mean. ns, no significance.

(F) Multiphoton images of SH tendon in control (DMSO) and regenerated (Mtz) fish at 180 dpf. Ventral views, anterior to the top. SHG, second harmonic generation. White arrows, SH tendon lobes. Scale bar, 100  $\mu\text{m}$ .

(G) Cartoons for SH tendon lobes in control (DMSO) and regenerated (Mtz) SH tendons at 180 dpf.

(H) Distribution of collagen fibril diameter, area, and area contribution in regenerated SH tendon at 180 dpf after normalizing to control SH tendon. dpf, days post fertilization. nm, nanometer.

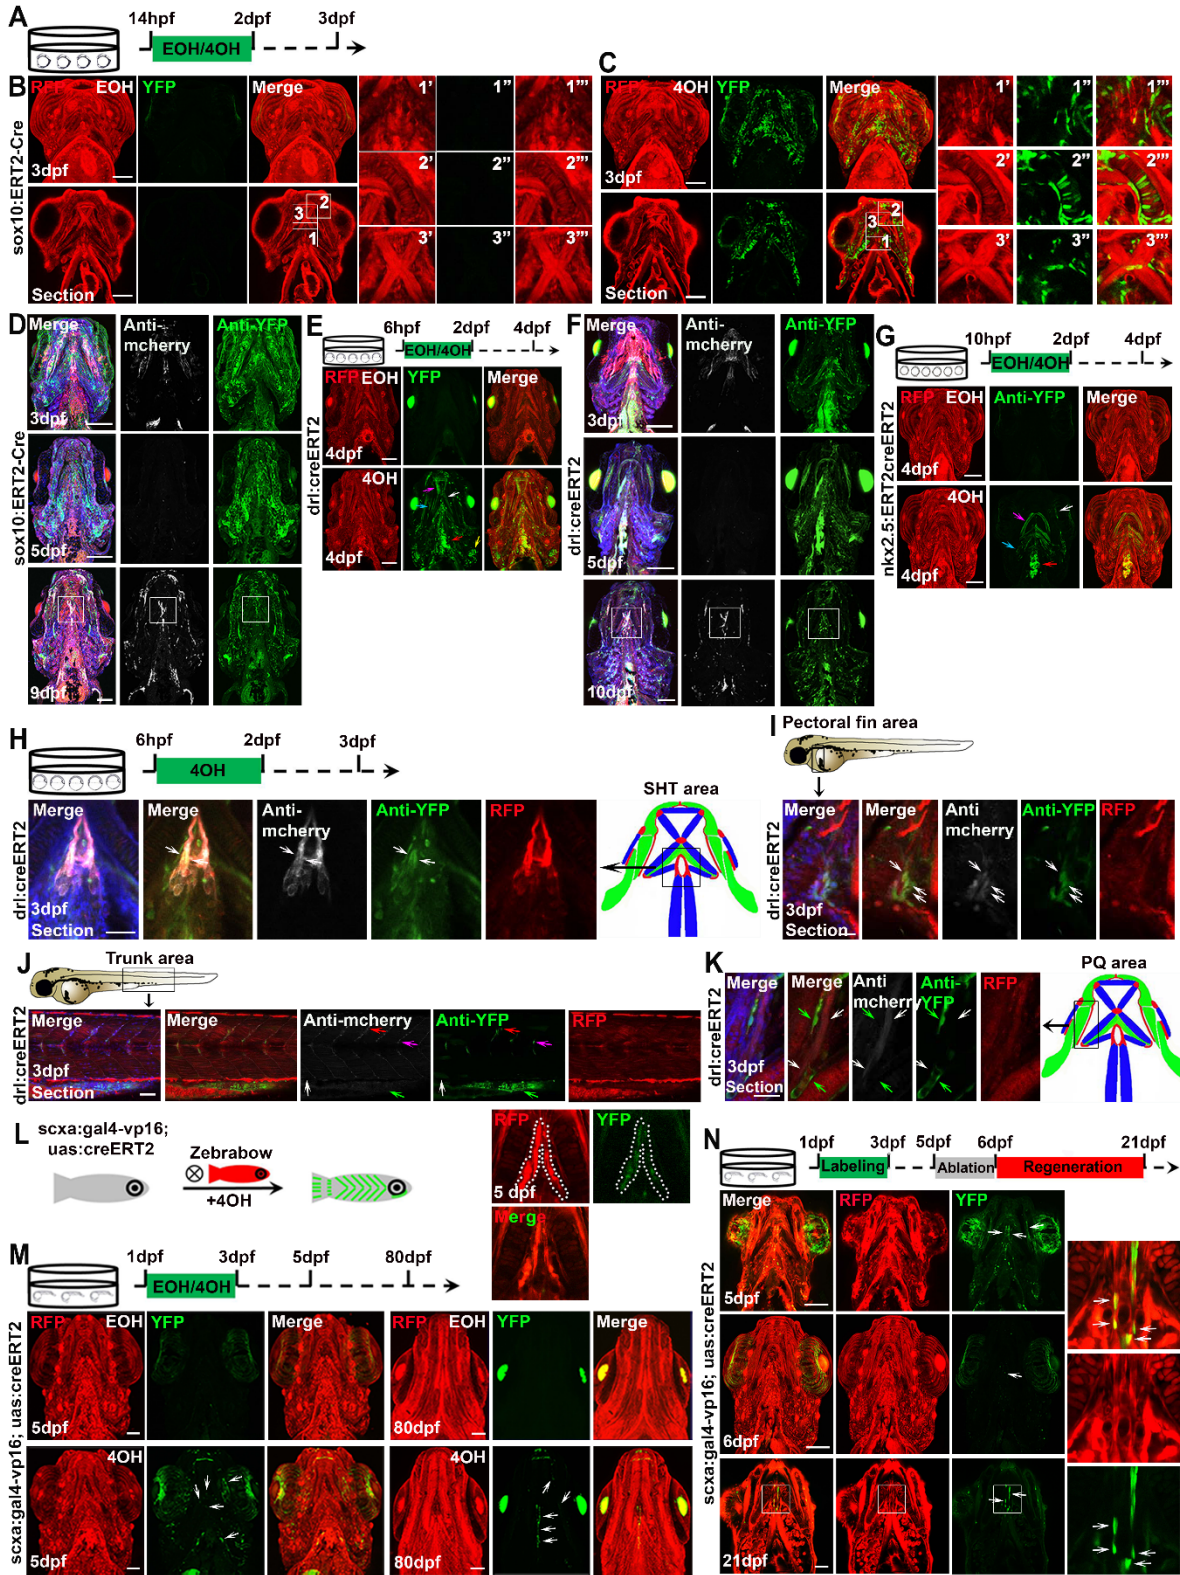

**Figure S4. CreER-loxP mediated strategy for SH tendon cell lineage tracing, Related to Figure 3 and Figure 4.**

(A-C) Recombination test of *Tg(sox10:ERT2-Cre; ubi:zebrabow)* line with Ethanol (EOH, B) and 4-hydroxytamoxifen (4OH, C). Insets show higher magnification view shown to the right. White box 1-1", SH tendon region. 2-2", Meckel's cartilage region. 3-3", mandibulo-hyoid junction region. Scale bar, 100  $\mu$ m.

(D) *sox10:ERT2-Cre* based cell lineage tracing of regenerated SH tendon cells (white box in bottom panels) in *Tg(scxa:gal4-vp16; uas:epNTR-RFP; uas-E1b:NfsB-mCherry; sox10:ERT2-Cre; ubi:zebrabow)* fish. 4OH treatment was performed at 14hpf-2dpf and tendon cells were ablated at 3-5dpf. Scale bar, 100  $\mu$ m.

(E) Recombination test of *Tg(drl:creERT2; ubi:zebrabow)* line with Ethanol (EOH) and 4-hydroxytamoxifen (4OH). Recombination could be observed in interhyal muscle (white arrow), intermandibularis posterior muscle (purple arrow), heart (red arrow), thymus (yellow arrow), and vasculature (cyan arrow). Scale bar, 100  $\mu$ m.

(F) *drl:creERT2* based cell lineage tracing for regenerated SH tendon cells (white box in bottom panels) in *Tg(scxa:gal4-vp16; uas:epNTR-RFP; uas-E1b:NfsB-mCherry; drl:creERT2; ubi:zebrabow)* fish. 4OH treatment was performed at 6hpf- 2dpf and tendon cells were ablated at 3-5dpf. Scale bar, 100  $\mu$ m.

(G) Recombination test of *Tg(nkx2.5:ERT2creERT2; ubi:zebrabow)* line with Ethanol (EOH) and 4-hydroxytamoxifen (4OH). Recombination could be observed in interhyal muscle (purple arrow), hypobranchial artery (white arrow), heart (red arrow), and vasculature (cyan arrow). Scale bar, 100  $\mu$ m.

(H-K) Developmentally *draculin*<sup>+</sup> lineage derived-cells contributed to SH tendon (H), pectoral fin tendon (I), and myosepta tendon (J), but not to other craniofacial tendons/ligaments (K). SHT area (white arrows, *draculin*<sup>+</sup> lineage-derived SH tendon cells. Scale bar, 25 $\mu$ m). Pectoral fin area (white arrows, *draculin*<sup>+</sup> lineage-derived tendon cells, Scale bar, 25 $\mu$ m). Trunk area (white arrow, superficial trunk muscle. green arrow, caudal hematopoietic tissue. purple arrow, endothelial cell, red arrow, *draculin*<sup>+</sup> lineage-derived tendon cell. scale bar, 50 $\mu$ m). PQ area (white arrows, PQ ligament. green arrows, *draculin*<sup>+</sup> lineage-derived endothelial cells. Scale bar, 25 $\mu$ m).

(L) *Tg(uas:creERT2)* line generated for *scxa*<sup>+</sup> cell lineage tracing and percentage of YFP-labeled SH tendon cell after recombination.

(M) Recombination test of *Tg(scxa:gal4-vp16; uas:creERT2; ubi:zebrabow)* line with EOH and 4OH. White arrow, labeled craniofacial tendon cells. Scale bar, 100 $\mu$ m for 5 dpf and 500 $\mu$ m for 80 dpf.

(N) *uas:creERT2* based cell lineage tracing for regenerated SH tendon cells (white box in bottom panels and white arrow in magnified images shown to the right) in *Tg(scxa:gal4-vp16; uas:epNTR-RFP; uas:creERT2; ubi:zebrabow)* fish. Scale bar, 100  $\mu$ m. In all Cre-mediated recombination tests, CFP and YFP expression were detected with an anti-GFP antibody. Blue color in (D, F, H-K) was Hoechst staining. hpf, hour post fertilization. dpf, day post fertilization. SHT, sternohyoideus tendon. PQ, palatoquadrate.



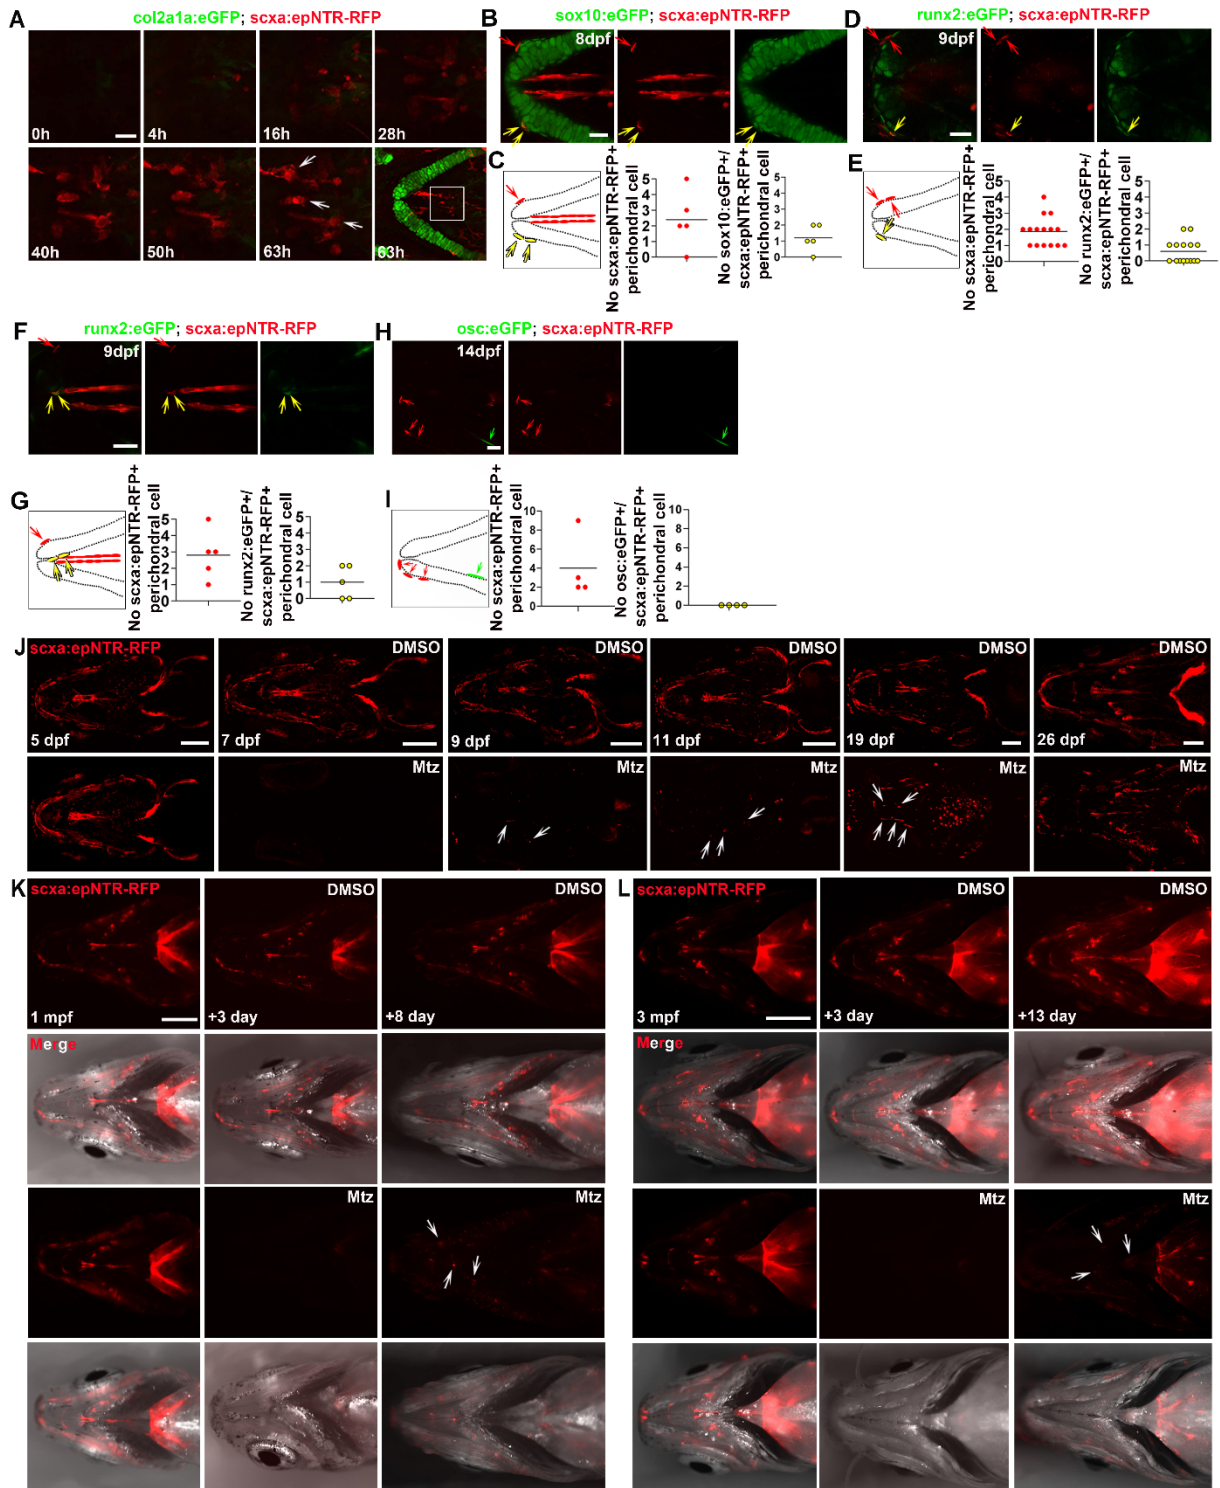



**Figure S5. Newly-induced tendon cells arise from musculoskeletal attachment sites and tendon cell ablation and regeneration at later stages. Related to Figure 3 and Figure 4.**

(A) Live imaging of new cell induction in SH muscle attachment site during regeneration in *Tg(scxa:gal4-vp16; uas:epNTR-RFP; col2a1a:eGFP)* fish. White arrow, newly induced tendon cell. White box in right merged image shows SH muscle attachment site analyzed. Scale bar, 25  $\mu$ m.

(B) Confocal images of ceratohyal cartilage attachment site in unablated *Tg(scxa:gal4-vp16; uas:epNTR-RFP; sox10:eGFP)* fish. Yellow arrow, *sox10:eGFP<sup>+</sup>/scxa:epNTR-RFP<sup>+</sup>* cells. Red arrow, *scxa:epNTR-RFP<sup>+</sup>* cells. Scale bar, 25  $\mu$ m.

(C) Cartoon and quantification of *scxa:epNTR-RFP<sup>+</sup>* and *sox10:eGFP<sup>+</sup>/scxa:epNTR-RFP<sup>+</sup>* cells in ceratohyal cartilage attachment site at 8dpf. In cartoon, yellow arrow shows *sox10:eGFP<sup>+</sup>/scxa:epNTR-RFP<sup>+</sup>* cells, red arrow shows *scxa:epNTR-RFP<sup>+</sup>* cells. Black dashed line in cartoon demarcated ceratohyal cartilage.

(D) Confocal images of ceratohyal cartilage attachment site in *Tg(scxa:gal4-vp16; uas:epNTR-RFP; runx2:eGFP)* fish. Yellow arrow, *runx2:eGFP<sup>+</sup>/scxa:epNTR-RFP<sup>+</sup>* cells. Red arrow, *scxa:epNTR-RFP<sup>+</sup>* cells. Scale bar, 25  $\mu$ m.

(E) Cartoon and quantification of *scxa:epNTR-RFP<sup>+</sup>* and *runx2:eGFP<sup>+</sup>/scxa:epNTR-RFP<sup>+</sup>* cells in ceratohyal cartilage attachment site at 9dpf. In cartoon, yellow arrow shows *runx2:eGFP<sup>+</sup>/scxa:epNTR-RFP<sup>+</sup>* cells, red arrow shows *scxa:epNTR-RFP<sup>+</sup>* cells. Black dashed line in cartoon demarcated ceratohyal cartilage.

(F) Confocal images of ceratohyal cartilage attachment site in unablated *Tg(scxa:gal4-vp16; uas:epNTR-RFP; runx2:eGFP)* fish. Yellow arrow, *runx2:eGFP<sup>+</sup>/scxa:epNTR-RFP<sup>+</sup>* cells. Red arrow, *scxa:epNTR-RFP<sup>+</sup>* cells. Scale bar, 25  $\mu$ m.

(G) Cartoon and quantification of *scxa:epNTR-RFP<sup>+</sup>* and *runx2:eGFP<sup>+</sup>/scxa:epNTR-RFP<sup>+</sup>* cells in ceratohyal cartilage attachment site at 9dpf. In cartoon, yellow arrow shows *runx2:eGFP<sup>+</sup>/scxa:epNTR-RFP<sup>+</sup>* cells, red arrow shows *scxa:epNTR-RFP<sup>+</sup>* cells. Black dashed line in cartoon demarcated ceratohyal cartilage.

(H) Confocal images of ceratohyal cartilage attachment site in *Tg(scxa:gal4-vp16; uas:epNTR-RFP; osc:eGFP)* fish. Red arrow, *scxa:epNTR-RFP<sup>+</sup>* cells. Green arrow, *osc:eGFP<sup>+</sup>* osteoblast. Scale bar, 25  $\mu$ m.

(I) Cartoon and quantification of *scxa:epNTR-RFP<sup>+</sup>* and *osc:eGFP<sup>+</sup>/scxa:epNTR-RFP<sup>+</sup>* cells in ceratohyal cartilage attachment site at 14dpf. In cartoon, red arrow shows *scxa:epNTR-RFP<sup>+</sup>* cells, green arrow shows *osc:eGFP<sup>+</sup>* osteoblast. Black dashed line in cartoon demarcated ceratohyal cartilage.

(J) Tendon cell regeneration upon ablation at 5-7 dpf. White arrow indicates new cell. Scale bar, 200  $\mu$ m.

(K) Tendon cell regeneration upon ablation at 30-33 dpf. White arrow indicates new cell. Scale bar, 0.5 mm.

(L) Tendon cell regeneration upon ablation at 90-93 dpf. White arrow indicates new cell. Scale bar, 0.2 cm.

dpf, days post fertilization. mpf, month post fertilization. For (A, D, E, H, I), tendon cell was ablated at 3-5dpf. All image, ventral view, anterior to the left.

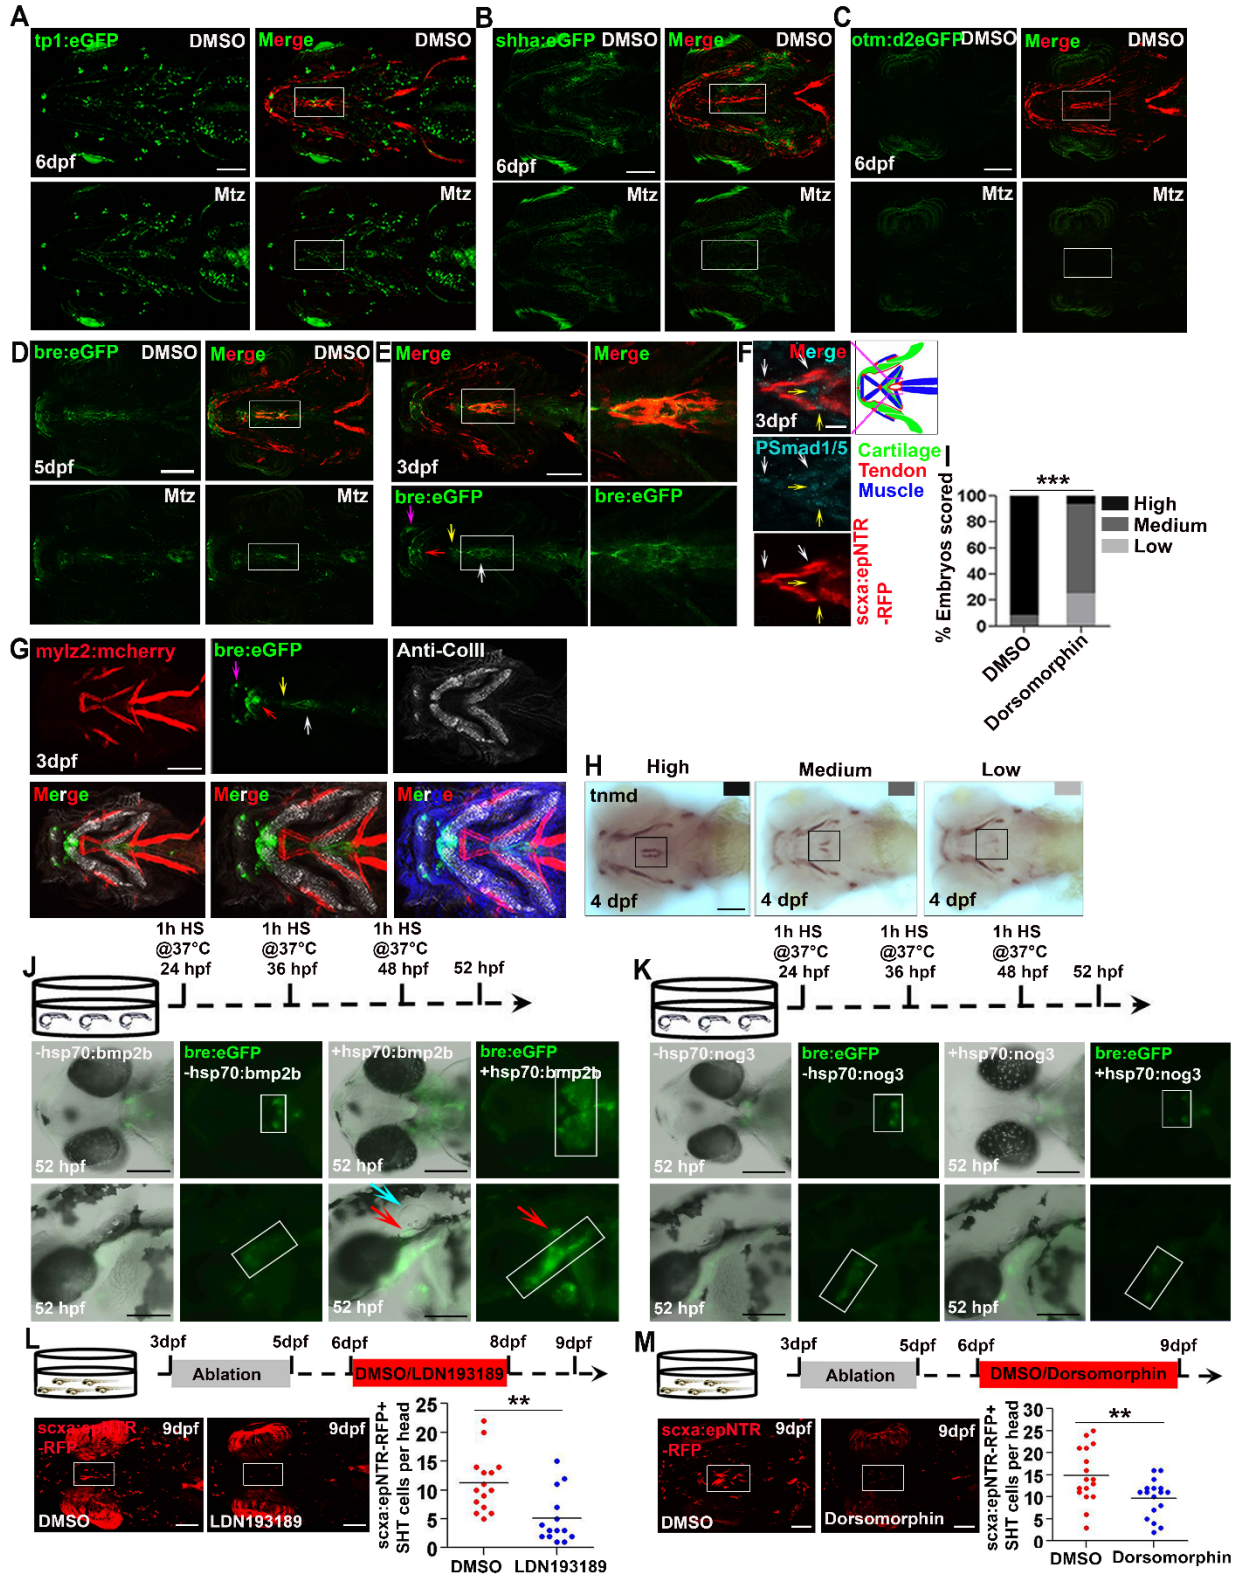

**Figure S6. Identification of the BMP pathway as being involved in tendon development and regeneration, Related to Figure 5.**

(A) Live images of tendon cells (red) and cells responding to Notch signaling (green) in unablated (DMSO) and ablated (Mtz) *Tg(scxa:gal4-vp16; uas:epNTR-RFP; tp1:eGFP)* fish. White box, SH tendon region. Scale bar, 200  $\mu$ m.

(B) Live images of tendon cells (red) and cells responding to Sonic hedgehog signaling (green) in unablated (DMSO) and ablated (Mtz) *Tg(scxa:gal4-vp16; uas:epNTR-RFP; shha:eGFP)* fish. White box, SH tendon region. Scale bar, 200  $\mu$ m.

(C) Live images of tendon cells (red) and cells responding to Wnt signaling (green) in unablated (DMSO) and ablated (Mtz) *Tg(scxa:gal4-vp16; uas:epNTR-RFP; otm:d2eGFP)* fish. White box, SH tendon region. Scale bar, 200  $\mu$ m.

(D) Live images of tendon cells (red) and cells responding to BMP signaling (green) in unablated (DMSO) and ablated (Mtz) *Tg(scxa:gal4-vp16; uas:epNTR-RFP; bre:eGFP)* fish. White box, SH tendon region. Scale bar, 200  $\mu$ m.

(E) Confocal images of tendon (red) and BMP signaling (green) in *Tg(scxa:gal4-vp16; uas:epNTR-RFP; bre:eGFP)* fish. White box showed magnified SH tendon region in the right panels. White arrow, *bre:eGFP* expression in SH tendon. Purple arrow, *bre:eGFP* expression surrounding the mouth. Red arrow, *bre:eGFP* expression surrounding Meckel's cartilage. Yellow arrow, *bre:eGFP* expression in the mandibulo-hyoid junction. White box, SH tendon region. Scale bar, 100  $\mu$ m.

(F) Confocal images of SH tendon (red) and Phospho-Smad1/5 (cyan) in *Tg(scxa:gal4-vp16; uas:epNTR-RFP)* fish. Images were from purple boxed area shown to the right cartoon. Active P-Smad1/5 signals are seen in tendon cells (white arrows) and non-tendon cells (yellow arrows). Scale bar, 25  $\mu$ m.

(G) Confocal images of muscle (red), *bre:eGFP* expression (green), and cartilage (white) in *Tg(myhz2:mcherry; bre:eGFP)* fish. Inset shows magnified views shown at the bottom right. White arrow, *bre:eGFP* expression in SH tendon. Purple arrow, *bre:eGFP* expression surrounding the developing mouth. Red arrow, *bre:eGFP* expression surrounding Meckel's cartilage. Yellow arrow, *bre:eGFP* expression in the mandibulo-hyoid junction. Blue color was Hoechst staining. Scale bar, 100  $\mu$ m.

(H) Craniofacial *tnmd* expression upon DMSO and Dorsomorphin treatment. Treatment was performed at 1-3dpf. Black box, SH tendon region. Scale bar, 100  $\mu$ m.

(I) Quantification of embryos with high, medium and low expression of *tnmd* in SH tendon region upon DMSO and Dorsomorphin treatment. n=12 for DMSO, n=16 for Dorsomorphin. Chi test. \*\*\*, p<0.001.

(J) Live images of *Tg(bre:eGFP)* fish at 52 hpf with (+*hsp70:bmp2b*) and without (-*hsp70:bmp2b*) *bmp2b* over expression. Enhanced signal could be observed in the lower jaw region (white box), and region (red arrow) closely adjacent to utricle of inner ear (cyan arrow). Scale bar, 100  $\mu$ m. Top panels show ventral view, bottom panels show lateral view.

(K) Live images of *Tg(bre:eGFP)* fish at 52 hpf with (+*hsp70:nog3*) and without (-*hsp70:nog3*) *nog3* over expression. Reduced signal could be observed in lower jaw region (white box). Top panels show ventral view, bottom panels show lateral view. Scale bar, 100  $\mu$ m.

(L) Live images (ventral view) of SHT cell regeneration in DMSO or LDN193189-treated *Tg(scxa:gal4-vp16; uas:epNTR-RFP)* fish. White box showed SHT region analyzed. Quantification (right) of SHT cell number in DMSO (n=15, average =11 cells) or LDN193189 (n=14, average=5 cells) treatment. Each dot represents the cell number in individual fish. Two-tailed, unpaired Student's t-test and data were mean. \*\*, p<0.01. Scale bar, 100  $\mu$ m.

(M) Live images of SH tendon cell regeneration in DMSO or Dorsomorphin-treated *Tg(scxa:gal4-vp16; uas:epNTR-RFP)* fish. White box showed SH tendon region analyzed. Quantification (right) of SH tendon cells in DMSO (n=17, average = 14 cells) or Dorsomorphin (n=17, average = 9 cells) treatment. Each dot represents the cell number in individual fish. Two-tailed, unpaired Student's t-test and data were mean. \*\*, p<0.01. Scale bar, 100  $\mu$ m.

dpf, days post fertilization. hpf, hours post fertilization. SHT, sternohyoideus tendon. For (A-D, L, M), tendon cell was ablated at 3-5dpf. All images, ventral view, anterior to the left.



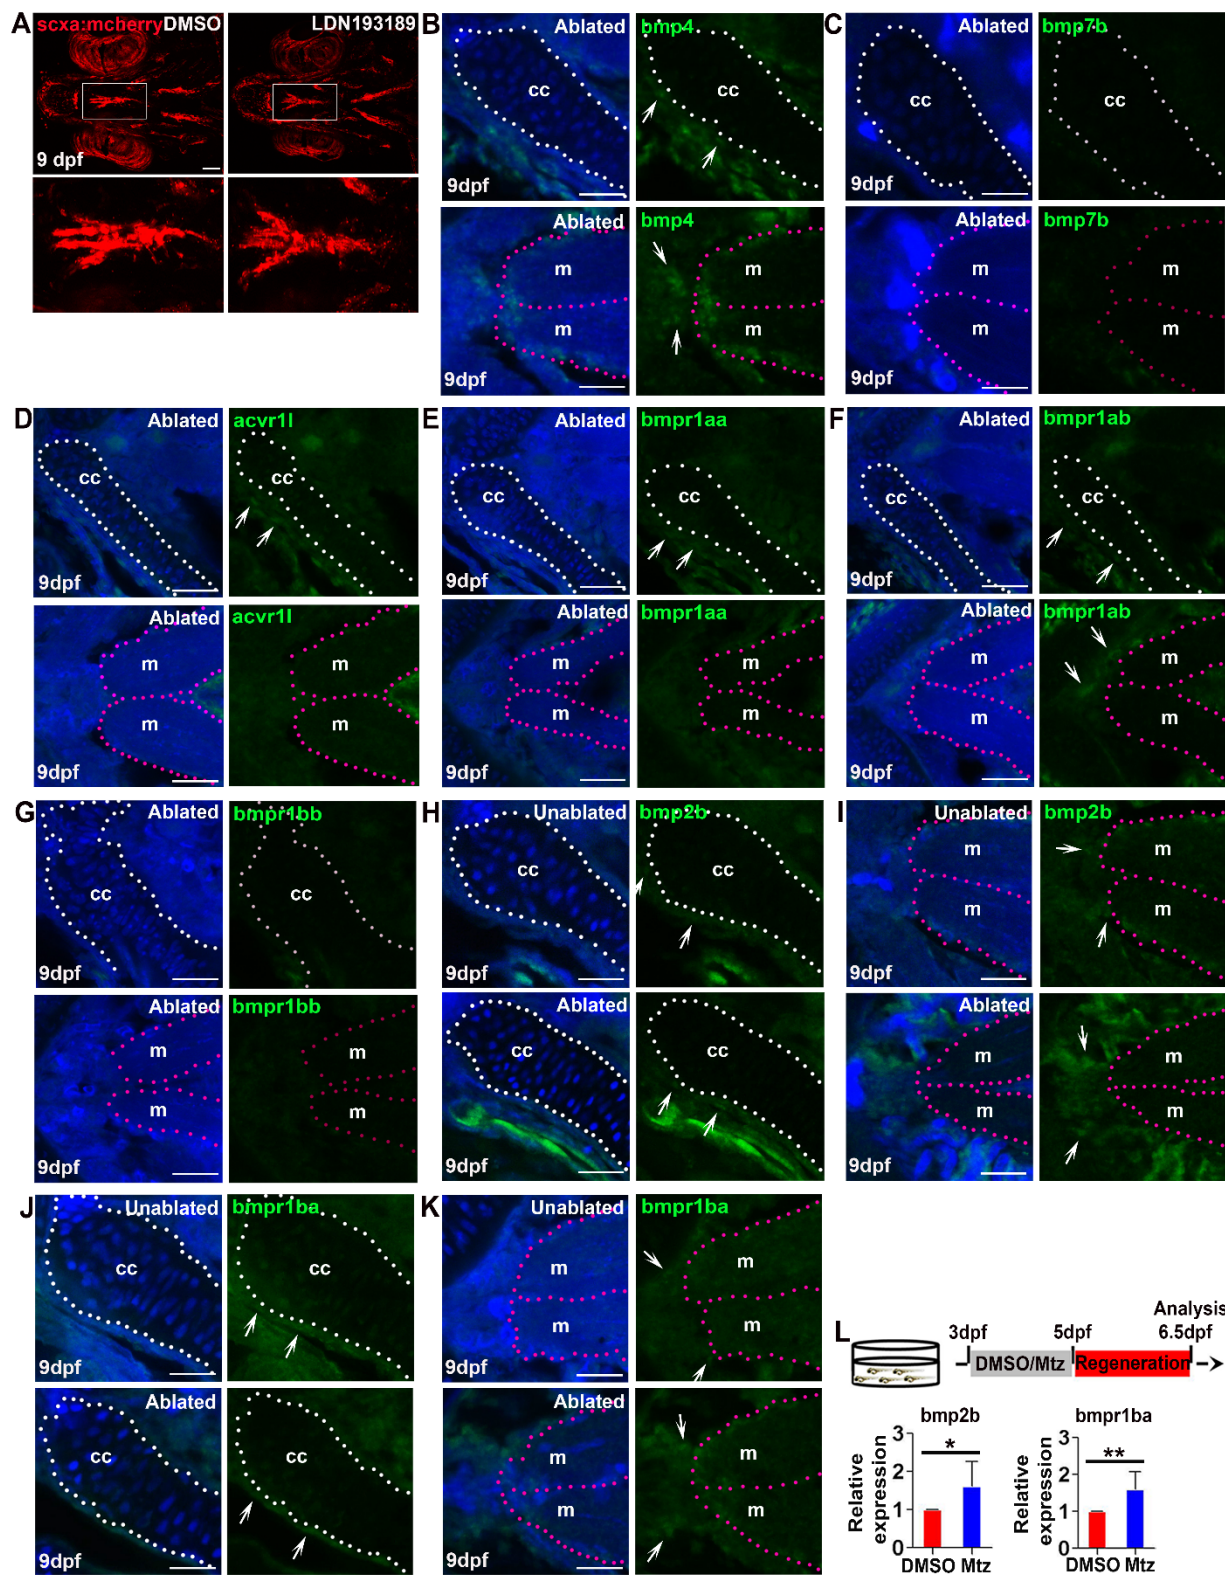

**Figure S7. LDN-193189 treatment in unablated fish and BMP ligand and receptor expression in ceratohyal cartilage and SH muscle attachment sites, Related to Figure 7.**

(A) Live images of craniofacial tendon cell development in DMSO or LDN193189-treated *Tg(scxa:mcherry)* fish. White box indicated SH tendon region showed below. Treatment was performed at 6-8dpf.

(B) *bmp4* expression (white arrow) in ceratohyal cartilage and SH muscle attachment site in ablated embryos.

(C) *bmp7b* expression (white arrow) in ceratohyal cartilage and SH muscle attachment site in ablated embryos.

(D) *acvr1l* expression (white arrow) in ceratohyal cartilage and SH muscle attachment site in ablated embryos.

(E) *bmpr1aa* expression (white arrow) in ceratohyal cartilage and SH muscle attachment site in ablated embryos.

(F) *bmpr1ab* expression (white arrow) in ceratohyal cartilage and SH muscle attachment site in ablated embryos.

(G) *bmpr1bb* expression (white arrow) in ceratohyal cartilage and SH muscle attachment site in ablated embryos.

(H) *bmp2b* expression (white arrow) in ceratohyal cartilage attachment site in unablated and ablated embryos.

(I) *bmp2b* expression (white arrow) in SH muscle attachment site in unablated and ablated embryos.

(J) *bmpr1ba* expression (white arrow) in ceratohyal cartilage attachment site in unablated and ablated embryos.

(K) *bmpr1ba* expression (white arrow) in SH muscle attachment site in unablated and ablated embryos.

(L) qPCR analysis of *bmp2b* and *bmpr1ba* expression in unablated (DMSO) and ablated (Mtz) fish at 6.5dpf. n=7 independent replicates. Two-tailed, unpaired Student's t-test and data were mean  $\pm$  s.d. \*, p<0.05. \*\*, p<0.01.

Tendon cells were ablated at 3-5dpf. Blue color in (B-K) was Hoechst staining. cc, ceratohyal cartilage. m, SH muscle. White dashed line demarcated ceratohyal cartilage. Red dashed line demarcated SH muscle. Scale bar, 100  $\mu$ m for (A) and 20  $\mu$ m for (B-K). All images, ventral view, anterior to the left.



| Fish line               | Direction of primer | Primer sequence (5'-3')      |
|-------------------------|---------------------|------------------------------|
| <i>hsp70:bmp2b</i>      | forward             | TCCCCGACGAGGTGTTTATTC        |
|                         | Reverse             | CGTGATGAAAACCTTCGTATCGTGTTTG |
| <i>hsp70:nog3</i>       | Forward             | CGCAGGAAAGAACATGTGAGC        |
|                         | reverse             | CGGGTTGGACTCAAGACGATAG       |
| <i>uas:nfsb-mcherry</i> | forward             | TGAGCAAGGGCGAGGAGGATAACA     |
|                         | reverse             | CATGCCGCCGGTGGAGTGG          |

**Table S1. Primers used for genotyping. Related to Figure 5**

| Gene           | Direction of primer | Primer sequence (5'-3')  |
|----------------|---------------------|--------------------------|
| <i>bmp2b</i>   | forward             | TCGGCGATGAGCGGATGACC     |
|                | reverse             | CACGCCCACACCACCCACAGA    |
| <i>bmp4</i>    | forward             | CGAGCCAACACCGTGAGAGGATT  |
|                | reverse             | AGGCTTTGGGGATATTGGTGTTC  |
| <i>bmp7b</i>   | forward             | CCAGGAGCGCCGGGAGATGC     |
|                | reverse             | CTTGGCGGTTTTGGAGCGGTTGG  |
| <i>bmpr1aa</i> | forward             | CACTGGCTGGCCTTTCTCATCTC  |
|                | reverse             | CAGCAGGTGCCGTTTTCTTG     |
| <i>bmpr1ab</i> | forward             | CTAGGCCGCTGGAGAGGAGAAA   |
|                | reverse             | GAGGCGTGAGGCTGGATTGTG    |
| <i>bmpr1ba</i> | forward             | GATCGGGAAGGGTCGCTATGGAG  |
|                | reverse             | TTAACGCGGAGGGCTGTGAGAC   |
| <i>bmpr1bb</i> | forward             | TGCTGGGCGTCTTGTGGATTTATT |
|                | reverse             | CTGCCGGAGCTCTGCGACTG     |
| <i>acvr1l</i>  | forward             | TGGCACGGAGGGCAAACC       |
|                | reverse             | GCGCAGGGCAGTGAGACGAG     |

**Table S2. Primers used for making BMP probes. Related to Figure S7 and STAR Methods**

| Gene              | Direction of primer | Primer sequence (5'-3')  |
|-------------------|---------------------|--------------------------|
| <i>bmp2b</i>      | forward             | TCAGCCGCCTATACACAGAGATG  |
|                   | reverse             | ACCGGCCGTTTCGTCAAGA      |
| <i>bmpr1ba</i>    | forward             | CCTCAGCGCTTCCTTTGGTGTTAC |
|                   | reverse             | GTGTTGGGTGCAGGTCTCGGTTAC |
| <i>beta actin</i> | forward             | GATGCCCTCGTGCTGTTTTC     |
|                   | reverse             | TCTCTGTTGGCTTTGGGATTCA   |

**Table S3. Primers used for qPCR. Related to Figure S7 and STAR Methods**
